# Supplementary material
Source: PubMed Central journal article supplement (PMC3473170)
Supplement: NIHMS400956-supplement-2.pdf [file NIHMS400956-supplement-2.pdf]

### Supplementary Figure 1

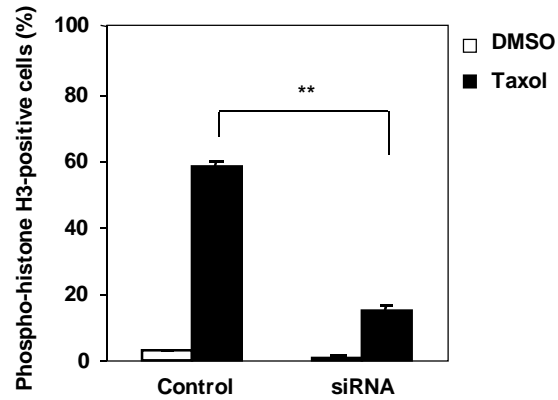

**Supplementary Figure 1. Shp2 depletion decreases taxol-induced mitotic arrest.** HeLa cells were transfected with control or Shp2 siRNA. Forty-eight hours later, transfected cells were treated with taxol (10  $\mu$ M) for 16 hours. Percentages of mitotic cells were determined by PI and phospho-histone H3 double staining and FACS analyses as described in Figure 1. The data shown are mean $\pm$ S.D. of three independent experiments.
