# Supplementary material
Source: PubMed Central journal article supplement (PMC3473170)
Supplement: NIHMS400956-supplement-3.pdf [file NIHMS400956-supplement-3.pdf]

### Supplementary Figure 2

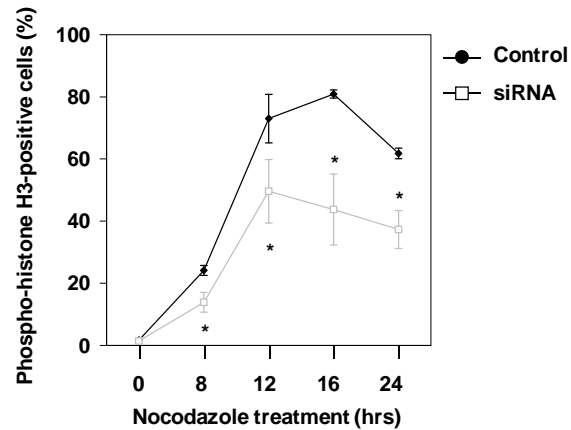

**Supplementary Figure 2. Shp2-depleted cells fail to sustain nocodazole-induced mitotic arrest.** HeLa cells transfected with control or Shp2 siRNA were synchronized at G<sub>1</sub> by thymidine double block. Synchronized cells were then cultured in the presence of nocodazole (200 ng/ml) for the indicated periods of time. Percentages of mitotic cells were determined by PI and phospho-histone H3 double staining and FACS analyses as described in Figure. 1. The data shown are mean±S.D. of three independent experiments.
