# Supplementary material
Source: PubMed Central journal article supplement (PMC3473170)
Supplement: NIHMS400956-supplement-4.pdf [file NIHMS400956-supplement-4.pdf]

Supplementary Figure 3

A

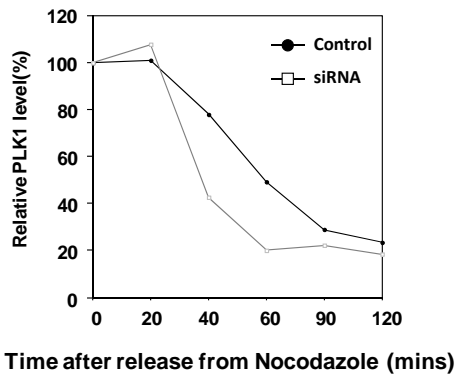

B

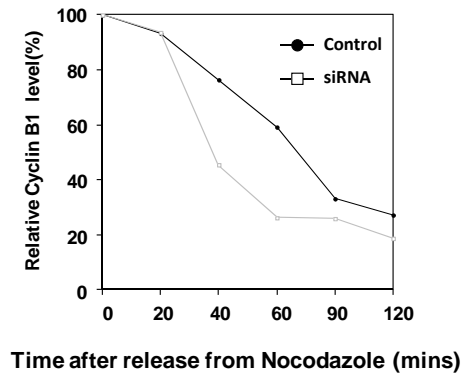

**Supplementary Figure 3. Shp2 depletion causes premature PLK1 and Cyclin B1 degradation.** HeLa cells were transfected with Shp2 siRNA or scramble RNA and then treated with nocodazole (200 ng/ml) for 16 hours. Mitotic cells were collected by “shake-off”. After washing, mitotic cells were replated in fresh medium without nocodazole. Cells were then harvested at the indicated time points for immunoblotting analyses for PLK1 and Cyclin B1. Relative PLK1 (A) and Cyclin B1 (B) levels were determined by densitometry and were normalized to those at time 0 minute after release from nocodazole treatment.
